# Supplementary material
Source: ML conference proceedings conference paper supplement (https://proceedings.neurips.cc/paper_files/paper/2020/hash/d3b1fb02964aa64e257f9f26a31f72cf-Abstract.html)
Supplement: Supplementary file [file d3b1fb02964aa64e257f9f26a31f72cf-Supplemental.pdf]

## A Proof of Theorem 1 and 2

A standard regret analysis consists of proving the optimism, bounding the deviations and bounding the probability of failing the confidence set. Our analysis follows the standard procedure while adapting them to a FMDP setting.

**Some notations.** For simplicity, we let  $\pi^*$  denote the optimal policy of the true MDP,  $\pi(M)$ . Let  $t_k$  be the starting time of episode  $k$  and  $K$  be the total number of episodes. Since  $\tilde{R}^k(x, s)$  for any  $(x, s) \in \tilde{\mathcal{X}}$  does not depend on  $s$ , we also let  $\tilde{R}^k(x)$  denote  $\tilde{R}^k(x, s)$  for any  $s$ . Let  $\lambda^*$  and  $\lambda_k$  denote the optimal average reward for  $M$  and  $M_k$ .

**Confidence set.** Before proving the theorems, we first introduce the confidence set for both transition probability and reward functions. Let  $\mathcal{M}_k$  be the confidence set of FMDPs at the start of episode  $k$  with the same factorization, such that for and each  $i \in [l]$ ,

$$|R_i(x) - \hat{R}_i^k(x)| \leq E_{R_i}^k(x), \forall x \in \mathcal{X}[Z_i^R],$$

where  $E_{R_i}^k(x) := \sqrt{\frac{12 \log(6l|\mathcal{X}[Z_i^R]|t_k/\rho)}{\max\{N_{R_i}^k(x), 1\}}}$  as defined in (3);

and for each  $j \in [m]$

$$|P_j(s|x) - \hat{P}_j^k(s|x)| \leq E_{P_j}^k(s|x), \forall x \in \mathcal{X}[Z_j^P], s \in \mathcal{S}_j,$$

where  $W_{P_j}^k(s|x)$  is defined in (2). It can be shown that

$$|P_j(x) - \hat{P}_j^k(x)|_1 \leq 2\sqrt{\frac{18|\mathcal{S}_j| \log(6S_j m |\mathcal{X}[Z_j^P]|t_k/\rho)}{\max\{N_{P_j}^k(x), 1\}}},$$

where  $\bar{E}_{P_i}^k(x) := 2\sqrt{\frac{18|\mathcal{S}_i| \log(6S_i m |\mathcal{X}[Z_i^P]|t_k/\rho)}{\max\{N_{P_i}^k(x), 1\}}}$ .

In the following analysis, we all assume that the true MDP  $M$  for both PSRL and DORL are in  $\mathcal{M}_k$  and  $M_k$  by PSRL are in  $\mathcal{M}_k$  for all  $k \in [K]$ . In the end, we will bound the regret caused by the failure of confidence set.

**Regret decomposition.** We follow the standard regret analysis framework by Jaksch et al. (2010). We first decompose the total regret into three parts in each episode:

$$\begin{aligned} R_T &= \sum_{t=1}^T (\lambda^* - r_t) \\ &= \sum_{k=1}^K \sum_{t=t_k}^{t_{k+1}-1} (\lambda^* - \lambda_k) \end{aligned} \quad (4)$$

$$+ \sum_{k=1}^K \sum_{t=t_k}^{t_{k+1}-1} (\lambda_k - R(s_t, a_t)) \quad (5)$$

$$+ \sum_{k=1}^K \sum_{t=t_k}^{t_{k+1}-1} (R(s_t, a_t) - r_t). \quad (6)$$

Using Hoeffding's inequality, the regret caused by (6) can be upper bounded by  $\sqrt{\frac{5}{2}T \log\left(\frac{8}{\rho}\right)}$ , with probability at least  $\frac{\rho}{12}$ .

### A.1 Bounding term (4)

We bound the regret caused by (4).

**PSRL.** For PSRL, since we use fixed episodes, we follow the techniques from Osband et al. (2013) and show that the expectation of (4) equals to zero.

**Lemma 1** (Lemma 1 in Osband et al. (2013)). *If  $\phi$  is the distribution of  $M$ , then, for any  $\sigma(H_{t_k})$  – measurable function  $g$ ,*

$$\mathbb{E}[g(M) | H_{t_k}] = \mathbb{E}[g(M_k) | H_{t_k}].$$

We let  $g = \lambda(M, \pi(M))$ . As  $g$  is a  $\sigma(H_{t_k})$  – measurable function. Since  $t_k, K$  are fixed value for each  $k$ , we have (4) =  $\mathbb{E}[\sum_{k=1}^K \sum_{t=t_k}^{t_{k+1}-1} (\lambda^* - \lambda_k)] = 0$ .

**DORL.** For DORL, we need to prove optimism, i.e,  $\lambda(M_k, \tilde{\pi}_k) \geq \lambda^*$  with high probability. We follow the proof in Agrawal and Jia (2017). In the case of FMDP, we show that for any policy  $\pi$  for the true FMDP, there exists a policy  $\tilde{\pi}$  for  $M_k$  such that  $(P(M_k, \tilde{\pi}) - P(M, \pi))\mathbf{h} \geq 0$  for any  $\mathbf{h} \in \mathbb{R}^S$ . This is proved in Lemma 2.

**Lemma 2.** *For any policy  $\pi$  for  $M$  and any vector  $\mathbf{h} \in \mathbb{R}^S$ , let  $\tilde{\pi}$  be the policy for  $M_k$  satisfying  $\tilde{\pi}(s) = (\pi(s), s^*)$ , where  $s^* = \arg \max_s \mathbf{h}(s)$ . Then, given  $M \in \mathcal{M}_k$ ,  $(P(M_k, \tilde{\pi}) - P(M, \pi))\mathbf{h} \geq 0$ .*

*Proof.* We fix some  $s \in \mathcal{S}$  and let  $x = (s, \pi(s)) \in \mathcal{X}$ . Recall that for any  $s_i \in \mathcal{S}_i$ ,  $\Delta_i^k(s_i|x) =$

$$\min \left\{ \sqrt{\frac{18 \hat{P}_i^k(s_i|x) \log(c_{i,k})}{\max\{N_{P_i}^k(x), 1\}}} + \frac{18 \log(c_{i,k})}{\max\{N_{P_i}^k(x), 1\}}, \hat{P}_i^k(s_i|x) \right\}.$$

and define  $P_i^-(\cdot|x) = \hat{P}_i^k(\cdot|x) - \Delta_i^k(\cdot|x)$ . Slightly abusing the notations, let  $\tilde{\mathbf{P}} = P(M_k, \tilde{\pi})_{s,\cdot}$ ,  $\mathbf{P} = P(M, \pi)_{s,\cdot}$ . Define two  $S$ -dimensional vectors  $\tilde{\mathbf{P}}$  and  $\mathbf{P}^-$  with  $\tilde{\mathbf{P}}(\bar{s}) = \prod_i \hat{P}_i(\bar{s}[Z_i^P]|x)$  and  $\mathbf{P}^-(\bar{s}) = \prod_i P_i^-(\bar{s}[Z_i^P]|x)$  for  $\bar{s} \in \mathcal{S}$ .

As  $M \in \mathcal{M}_k$ ,  $\mathbf{P}^- \leq \mathbf{P}$ . Define  $\boldsymbol{\alpha} := \hat{\mathbf{P}} - \mathbf{P} \leq \hat{\mathbf{P}} - \mathbf{P}^- =: \boldsymbol{\Delta}$ . Without loss of generality, we let  $\max_s \mathbf{h}(s) = D$ .

$$\begin{aligned} \sum_i \tilde{\mathbf{P}}(i)\mathbf{h}(i) &= \sum_i \mathbf{P}(i)^-\mathbf{h}(i) + D \left( 1 - \sum_j \mathbf{P}(j)^- \right) \\ &= \sum_i \mathbf{P}(i)^-\mathbf{h}(i) + D \sum_j \boldsymbol{\Delta}(j) \\ &= \sum_i \left( \hat{\mathbf{P}}(i) - \boldsymbol{\Delta}(i) \right) \mathbf{h}(i) + D \boldsymbol{\Delta}(i) \\ &= \sum_i \hat{\mathbf{P}}(i)\mathbf{h}(i) + (D - \mathbf{h}(i)) \boldsymbol{\Delta}(i) \\ &\geq \sum_i \hat{\mathbf{P}}(i)\mathbf{h}(i) + (D - \mathbf{h}(i)) \boldsymbol{\alpha}(i) \\ &= \sum_i \left( \hat{\mathbf{P}}(i) - \boldsymbol{\alpha}(i) \right) \mathbf{h}(i) + D \boldsymbol{\alpha}(i) \\ &= \sum_i \mathbf{P}(i)\mathbf{h}(i) + D \sum_i \boldsymbol{\alpha}(i) = \sum_i \mathbf{P}(i)\mathbf{h}(i) \end{aligned}$$

□

**Corollary 1.** *Let  $\tilde{\pi}^*$  be the policy that satisfies  $\tilde{\pi}^*(s) = (\pi^*(s), s^*)$ , where  $s^* = \arg \max_s \mathbf{h}(M)_s$  and  $\pi^*$  is the true optimal policy for  $M$ . Then  $\lambda(M_k, \tilde{\pi}^*, s_1) \geq \lambda^*$  for any starting state  $s_1$ .*

*Proof.* Let  $\mathbf{d}(s_1) := \mathbf{d}(M_k, \tilde{\pi}^*, s_1) \in \mathbb{R}^{1 \times S}$  be the row vector of stationary distribution starting from some  $s_1 \in \mathcal{S}$ . By optimal equation,

$$\begin{aligned}
& \lambda(M_k, \tilde{\pi}^*, s_1) - \lambda^* \\
&= \mathbf{d}(s_1) \mathbf{R}(M_k, \tilde{\pi}^*) - \lambda^* (\mathbf{d}(s_1) \mathbf{1}) \\
&= \mathbf{d}(s_1) (\mathbf{R}(M_k, \tilde{\pi}^*) - \lambda^* \mathbf{1}) \\
&= \mathbf{d}(s_1) (\mathbf{R}(M_k, \tilde{\pi}^*) - \mathbf{R}(M, \pi^*)) \\
&\quad + \mathbf{d}(s_1) (I - P(M, \pi^*)) \mathbf{h}(M) \\
&\geq \mathbf{d}(s_1) (\mathbf{R}(M_k, \tilde{\pi}^*) - \mathbf{R}(M, \pi^*)) \\
&\quad + \mathbf{d}(s_1) (P(M_k, \tilde{\pi}^*) - P(M, \pi^*)) \mathbf{h}(M) \\
&\geq 0,
\end{aligned}$$

where the last inequality is by Lemma 2 and Corollary 1 follows.  $\square$

Thereon,  $\lambda(M_k, \tilde{\pi}_k) \geq \lambda(M_k, \tilde{\pi}^*, s_1) \geq \lambda^*$ . The total regret of (4)  $\leq 0$ .

## A.2 Regret caused by deviation (5)

We further bound regret caused by (5), which can be decomposed into the deviation between our brief  $M_k$  and the true MDP. We first show that the diameter of  $M_k$  can be upper bounded by  $D$ .

**Bounded diameter.** We need diameter of extended MDP to be upper bounded to give a sublinear regret. For PSRL, since prior distribution has no mass on MDP with diameter greater than  $D$ , the diameter of MDP from posterior is upper bounded by  $D$  almost surely. For DORL, we have the following Lemma 3.

**Lemma 3.** *When  $M$  is in the confidence set  $\mathcal{M}_k$ , the diameter of the extended MDP  $D(M_k) \leq D$ .*

*Proof.* Fix a  $s_1 \neq s_2$ , there exist a policy  $\pi$  for  $M$  such that the expected time to reach  $s_2$  from  $s_1$  is at most  $D$ , without loss of generality we assume  $s_2$  is the last state. Let  $E$  be the  $(S-1) \times 1$  vector with each element to be the expected time to reach  $s_2$  except for itself. We find  $\tilde{\pi}$  for  $M_k$  such that the expected time to reach  $s_2$  from  $s_1$  can be bounded by  $D$ . We choose the  $\tilde{\pi}$  that satisfies  $\tilde{\pi}(s) = (\pi(s), s_2)$ .

Let  $Q$  be the transition matrix under  $\tilde{\pi}$  for  $M_k$ . Let  $Q^-$  be the matrix removing  $s_2$ -th row and column and  $P^-$  defined in the same way for  $M$ . We immediately have  $P^- E \geq Q^- E$ , given  $M \in \mathcal{M}_k$ . Let  $\tilde{E}$  be the expected time to reach  $s_2$  from every other states except for itself under  $\tilde{\pi}$  for  $M_k$ .

We have  $\tilde{E} = \mathbf{1} + Q^- \tilde{E}$ . The equation for  $E$  gives us  $E = \mathbf{1} + P^- E \geq \mathbf{1} + Q^- E$ . Therefore,

$$\tilde{E} = (1 - Q^-)^{-1} \mathbf{1} \leq E,$$

and  $\tilde{E}_{s_1} \leq E_{s_1} \leq D$ . Thus,  $D(M_k) \leq D$ .  $\square$

**Deviation bound.** Now we formally bound (5). In this section, the regrets for PSRL and DORL can be bounded in the same way. Let  $\nu_k(s, a)$  be the number of visits on  $s, a$  in episode  $k$  and  $\boldsymbol{\nu}_k$  be the row vector of  $\nu_k(\cdot, \pi_k(\cdot))$ . Let  $\Delta_k = \sum_{s,a} \nu_k(s, a) (\lambda(M_k, \tilde{\pi}_k) - R(s, a))$ . Using optimal equation,

$$\begin{aligned}
\Delta_k &= \sum_{s,a} \nu_k(s, a) \left[ \lambda(M_k, \tilde{\pi}_k) - \tilde{R}^k(s, a) \right] \\
&\quad + \sum_{s,a} \nu_k(s, a) \left[ \tilde{R}^k(s, a) - R(s, a) \right] \\
&= \boldsymbol{\nu}_k (\tilde{P}^k - I) \mathbf{h}_k + \boldsymbol{\nu}_k (\tilde{\mathbf{R}}^k - \mathbf{R}^k) \\
&= \underbrace{\boldsymbol{\nu}_k (P^k - I) \mathbf{h}_k}_{\textcircled{1}} + \underbrace{\boldsymbol{\nu}_k (\tilde{P}^k - P^k) \mathbf{h}_k}_{\textcircled{2}} + \underbrace{\boldsymbol{\nu}_k (\tilde{\mathbf{R}}^k - \mathbf{R}^k)}_{\textcircled{3}},
\end{aligned}$$

where  $\tilde{P}^k := P(M_k, \tilde{\pi}_k)$ ,  $P^k := P(M, \pi_k)$ ,  $\mathbf{h}_k := \mathbf{h}^*(M_k)$ , and  $\tilde{\mathbf{R}}^k := \mathbf{R}(M_k, \tilde{\pi}_k)$ ,  $\mathbf{R}^k := \mathbf{R}(M, \pi_k)$ .

Using Azuma-Hoeffding inequality and the same analysis in Jaksch et al. (2010), we bound ① with probability at least  $1 - \frac{\rho}{12}$ ,

$$\sum_k \textcircled{1} = \sum_k \nu_k (P^k - I) \mathbf{h}_k \leq D \sqrt{\frac{5}{2} T \log \left( \frac{8}{\rho} \right)} + KD. \quad (7)$$

To bound ② and ③, we analyze the deviation in transition and reward function between  $M$  and  $M_k$ . For DORL, the deviation in transition probability is upper bounded by

$$\begin{aligned} & \max_{s'} |\tilde{P}_i^k(x, s') - \hat{P}_i^k(x)|_1 \\ & \leq \min \left\{ 2 \sum_{s \in \mathcal{S}_i} E_{P_i^k}^k(s | x), 1 \right\} \\ & \leq \min \{ 2\bar{E}_{P_i^k}^k(x), 1 \} \leq 2\bar{E}_{P_i^k}^k(x), \end{aligned}$$

The deviation in reward function  $|\tilde{R}_i^k - \hat{R}_i^k|(x) \leq E_{R_i^k}^k(x)$ .

For PSRL, since  $M_k \in \mathcal{M}_k$ ,  $|\tilde{P}_i^k - \hat{P}_i^k|(x) \leq \bar{E}_{P_i^k}^k(x)$  and  $|\tilde{R}_i^k - \hat{R}_i^k|(x) \leq E_{R_i^k}^k(x)$ .

Decomposing the bound for each scope provided by  $M \in \mathcal{M}_k$  and  $M_k$  for PSRL  $\in \mathcal{M}_k$ , it holds for both PSRL and DORL that:

$$\sum_k \textcircled{2} \leq 3 \sum_k D \sum_{i=1}^m \sum_{x \in \mathcal{X}[Z_i^P]} \nu_k(x) \bar{E}_{P_i^k}^k(x), \quad (8)$$

$$\sum_k \textcircled{3} \leq 2 \sum_k \sum_{i=1}^l \sum_{x \in \mathcal{X}[Z_i^R]} \nu_k(x) E_{R_i^k}^k(x); \quad (9)$$

where with some abuse of notations, define  $\nu_k(x) = \sum_{x' \in \mathcal{X}: x'[Z_i] = x} \nu_k(x')$  for  $x \in \mathcal{X}[Z_i]$ . The second inequality is from the fact that  $|\tilde{P}^k(\cdot | x) - P^k(\cdot | x)|_1 \leq \sum_1^m |\tilde{P}_i^k(\cdot | x[Z_i^R]) - P_i^k(\cdot | x[Z_i^R])|_1$  (Osband and Van Roy, 2014).

### A.3 Bound (7), (8) and (9) by balancing episode length and episode number

We give a general criterion for bounding (7), (8) and (9), which we believe, is a new technique. We first introduce Lemma 4 which implies that bounding (7), (8) and (9) is to balance total number of episodes and the length of the longest episode. The proof, relies on defining the last episode  $k_0$ , such that  $N_{k_0}(x) \leq \nu_{k_0}(x)$ .

**Lemma 4.** *For any fixed episodes  $\{T_k\}_{k=1}^K$ , if there exists an upper bound  $\bar{T}$ , such that  $T_k \leq \bar{T}$  for all  $k \in [K]$ , we have the bound*

$$\sum_{x \in \mathcal{X}[Z]} \sum_k \nu_k(x) / \sqrt{\max\{1, N_k(x)\}} \leq L\bar{T} + \sqrt{L\bar{T}},$$

where  $Z$  is any scope with  $|\mathcal{X}[Z]| \leq L$ , and  $\nu_k(x)$  and  $N_k(x)$  are the number of visits to  $x$  in and before episode  $k$ . Furthermore, total regret of (7), (8) and (9) can be bounded by  $\tilde{O}((\sqrt{W}Dm + l)(L\bar{T} + \sqrt{L\bar{T}}) + KD)$

*Proof.* We bound the random variable  $\sum_{k=1}^K \frac{\nu_k(x)}{\sqrt{\max\{N_k(x), 1\}}}$  for every  $x \in \mathcal{X}[Z]$ , where  $\nu_k(x) = \sum_{t=t_k}^{t_{k+1}-1} \mathbb{1}(x_t = x)$  and  $N_k(x) = \sum_{i=1}^{k-1} \nu_k(x)$ .

Let  $k_0(x)$  be the largest  $k$  such that  $N_k(x) \leq \nu_k(x)$ . Thus  $\forall k \geq k_0(x)$ ,  $N_k(x) > \nu_k(x)$ , which gives  $N_t(x) := N_k(x) + \sum_{\tau=t_k}^t \mathbb{1}(x_\tau = x) < 2N_k(x)$  for  $t_k \leq t < t_{k+1}$ .

Conditioning on  $k_0(x)$ , we have

$$\begin{aligned}
& \sum_{k=1}^K \frac{\nu_k(x)}{\sqrt{\max\{N_k(x), 1\}}} \\
& \leq N_{k_0(x)}(x) + \nu_{k_0(x)}(x) + \sum_{k>k_0(x)} \frac{\nu_k(x)}{\sqrt{\max\{N_k(x), 1\}}} \\
& \leq 2\nu_{k_0(x)}(x) + \sum_{k>k_0(x)} \frac{\nu_k(x)}{\sqrt{\max\{N_k(x), 1\}}} \\
& \leq 2\bar{T} + \sum_{k>k_0(x)} \frac{\nu_k(x)}{\sqrt{\max\{N_k(x), 1\}}},
\end{aligned}$$

where the first inequality uses  $\max\{N_k(x), 1\} \geq 1$  for  $k = 1, \dots, k_0(x)$ , the second inequality is by the fact that  $N_{k_0(x)}(x) \leq \nu_{k_0(x)}(x)$  and the third one is by  $\nu_{k_0(x)}(x) \leq T_{k_0(x)} \leq T_K$ .

And letting  $k_1(x) = k_0(x) + 1$  and  $N(x) := N_K(x) + \nu_K(x)$ , we have

$$\begin{aligned}
& \sum_{k>k_0(x)} \frac{\nu_k(x)}{\sqrt{\max\{N_k(x), 1\}}} \\
& \leq \sum_{t=t_{k_1(x)}}^T 2 \frac{\mathbb{1}(x_t = x)}{\sqrt{\max\{N_t(x), 1\}}} \\
& \leq \sum_{t=t_{k_1(x)}}^T 2 \frac{\mathbb{1}(x_t = x)}{\sqrt{\max\{N_t(x) - N_{k_1(x)}, 1\}}} \\
& \leq 2 \int_1^{N(x) - N_{k_1(x)}} \frac{1}{\sqrt{x}} dx \\
& \leq (2 + \sqrt{2})\sqrt{N(x)}.
\end{aligned}$$

Given any  $k_0(x)$ , we can bound the term with a fixed value  $2\bar{T} + (2 + \sqrt{2})\sqrt{N(x)}$ . Thus, the random variable  $\sum_{k=1}^K \frac{\nu_k(x)}{\sqrt{\max\{N_k(x), 1\}}}$  is upper bounded by  $2\bar{T} + (2 + \sqrt{2})\sqrt{N(x)}$  almost surely. Finally,

$\sum_x \sum_{k=1}^K \frac{\nu_k(x)}{\sqrt{\max\{N_k(x), 1\}}} \leq L\bar{T} + (2 + \sqrt{2})\sqrt{LT}$ . The regret by (8) is

$$\begin{aligned}
& \sum_k 3D \sum_{i \in [m]} \sum_{x \in \mathcal{X}[Z_i^P]} \nu_k(x) \bar{W}_{P_i}^k(x) \\
& = \tilde{O}(\sqrt{W} D m (L\bar{T} + \sqrt{LT}) + KD).
\end{aligned}$$

The regret by (9) is

$$\sum_k 2 \sum_{i \in [l]} \sum_{x \in \mathcal{X}[Z_i^R]} \nu_k(x) \bar{W}_{R_i}^k(x) = \tilde{O}(l(L\bar{T} + \sqrt{LT}) + KD).$$

The last statement is completed by directly summing (7), (8) and (9).  $\square$

Instead of using the doubling trick that was used in Jaksch et al. (2010). We use an arithmetic progression:  $T_k = \lceil k/L \rceil$  for  $k \geq 1$ . As in our algorithm,  $T \geq \sum_{k=1}^{K-1} T_k \geq \sum_{k=1}^{K-1} k/L = \frac{(K-1)K}{2L}$ , we have  $K \leq \sqrt{3LT}$  and  $T_k \leq T_K \leq K/L \leq \sqrt{3T/L}$  for all  $k \in [K]$ . Thus, by Lemma 4, putting (6), (7), (9), (8) together, the total regret for  $M \in \mathcal{M}_k$  is upper bounded by

$$\tilde{O}((\sqrt{W} D m + l)\sqrt{LT}), \tag{10}$$

with a probability at least  $1 - \frac{\rho}{6}$ .

#### A.4 Failure of the confidence set

For the failure of confidence set, we prove the following Lemma.

**Lemma 5.** *For all  $k \in [K]$ , with probability greater than  $1 - \frac{3\rho}{8}$ ,  $M \in \mathcal{M}_k$  holds.*

*Proof.* We first deal with the probabilities, with which in each round a reward function of the true MDP  $M$  is not in the confidence set. Using Hoeffding's inequality, we have for any  $t, i$  and  $x \in \mathcal{X}[Z_i^R]$ ,

$$\begin{aligned} & \mathbb{P} \left\{ \left| \hat{R}_i^t(x) - R_i(x) \right| \geq \sqrt{\frac{12 \log(6l|\mathcal{X}[Z_i^R]|t/\rho)}{\max\{1, N_{R_i}^t(x)\}}} \right\} \\ & \leq \frac{\rho}{3l|\mathcal{X}[Z_i^R]|t^6}, \text{ with a summation } \leq \frac{3}{12}\rho. \end{aligned}$$

Thus, with probability at least  $1 - \frac{3\rho}{12}$ , the true reward function is in the confidence set for every  $t \leq T$ .

For the transition probability, we use a different concentration inequality.

**Lemma 6** (Multiplicative Chernoff Bound (Kleinberg et al., 2008) Lemma 4.9). *Consider  $n$ , i.i.d random variables  $X_1, \dots, X_n$  on  $[0, 1]$ . Let  $\mu$  be their mean and let  $X$  be their average. Then with probability  $1 - \rho$ ,*

$$|X - \mu| \leq \sqrt{\frac{3 \log(2/\rho)X}{n}} + \frac{3 \log(2/\rho)}{n}.$$

Using Lemma 6, for each  $x, i, k$ , it holds that with probability  $1 - \rho/(6m|\mathcal{X}[Z_i^P]|t_k^6)$ ,

$$|\hat{P}_i(\cdot|x) - P_i(\cdot|x)|_1 \leq \sqrt{\frac{18S_i \log(c_{i,k})}{\max\{N_{P_i}^k(x), 1\}}} + \frac{18 \log(c_{i,k})}{\max\{N_{P_i}^k(x), 1\}}.$$

Then with a probability  $1 - \frac{3\rho}{24}$ , it holds for all  $x, i, k$ . Therefore, with a probability  $1 - \frac{3\rho}{8}$ , the true MDP is in the confidence set for each  $k$ .  $\square$

Combined with (10), with probability at least  $1 - \frac{2\rho}{3}$  the regret bound in Theorem 2 holds.

For PSRL,  $M_k$  and  $M$  has the same posterior distribution. The expectation of the regret caused by  $M \notin \mathcal{M}_k$  and  $M_k \notin \mathcal{M}_k$  are the same. Choosing sufficiently small  $\rho \leq \sqrt{1/T}$ , Theorem 1 follows.

## B Proof of the lower bound

Our lower bound construction is a Cartesian product of  $n$  independent MDPs. We start by discussing the bias vector of such FMDP in Lemma 7.

**Lemma 7.** *Let  $M^+$  be the Cartesian product of  $n$  independent MDPs  $\{M_i\}_{i=1}^n$ , each with a span of bias vector  $sp(h_i)$ . The optimal policy for  $M^+$  has a span  $sp(h^+) = \sum_i sp(h_i)$ .*

*Proof.* Let  $\lambda_i^*$  for  $i \in [n]$  be the optimal gain of each MDP. Optimal gain of  $M^+$  is direct  $\lambda^* = \sum_{i \in [n]} \lambda_i^*$ . As noted in Puterman (2014) (8.2.3), by the definition of bias vector we have

$$h_i(s) = \mathbb{E} \left[ \sum_{t=1}^{\infty} (r_t^i - \lambda_i^*) \mid s_1^i = s \right], \quad \forall s \in \mathcal{S}_i,$$

where  $r_t^i$  is the reward of the  $i$ -th MDP at time  $t$  and  $s_t^i := s_t[i]$ .

The lemma is directly by

$$\begin{aligned}
h^+(s) &= \mathbb{E}\left[\sum_{t=1}^{\infty} (r_t - \lambda^*) \mid s_1 = s\right] \\
&= \mathbb{E}\left[\sum_{t=1}^{\infty} \left(\sum_{i \in [n]} (r_t^i - \lambda_i^*)\right) \mid s_1 = s\right] \\
&= \sum_{i \in [n]} \mathbb{E}\left[\sum_{t=1}^{\infty} (r_t^i - \lambda_i^*) \mid s_1^i = s[i]\right] \\
&= \sum_{i \in [n]} h_i(s[i]).
\end{aligned}$$

We immediately have  $sp(h^+) = \sum_i sp(h_i)$ .  $\square$

Recall Theorem 3 states for any algorithm, any graph structure satisfying  $\mathcal{G} = (\{\mathcal{S}_i\}_{i=1}^n; \{\mathcal{S}_i \times \mathcal{A}_i\}_{i=1}^n; \{Z_i^R\}_{i=1}^n; \{Z_i^P\}_{i=1}^n)$  with  $|\mathcal{S}_i| \leq W$ ,  $|\mathcal{X}[Z_i^R]| \leq L$ ,  $|\mathcal{X}[Z_i^P]| \leq L$  and  $i \in Z_i^P$  for  $i \in [n]$ , there exists an FM DP with an optimal bias vector  $\mathbf{h}^+$ , such that for any initial state  $s \in \mathcal{S}$ , the expected regret of the algorithm after  $T$  step is

$$\Omega(\sqrt{sp(\mathbf{h}^+)LT}). \quad (11)$$

*Proof.* Let  $l = |\cup_i^n Z_i^R|$ . As  $i \in Z_i^P$ , a special case is the FM DP with graph structure  $\mathcal{G} = (\{\mathcal{S}_i\}_{i=1}^n; \{\mathcal{S}_i \times \mathcal{A}_i\}_{i=1}^n; \{\{i\}\}_{i=1}^l \text{ and } \{\emptyset\}_{i=l+1}^n; \{\{i\}\}_{i=1}^n)$ , which can be decomposed into  $n$  independent MDPs as in the previous example. Among the  $n$  MDPs, the last  $n-l$  MDPs are trivial. By simply setting the rest  $l$  MDPs to be the construction used by Jaksch et al. (2010), which we refer to as "JAO MDP", the regret for each MDP with the span  $sp(\mathbf{h})$ , is  $\Omega(\sqrt{sp(\mathbf{h})WT})$  for  $i \in [l]$ . The total regret is  $\Omega(l\sqrt{sp(\mathbf{h})WT})$ .

Using Lemma 7,  $sp(\mathbf{h}^+) = l sp(\mathbf{h})$  and the total expected regret is  $\Omega(\sqrt{l sp(\mathbf{h}^+)WT})$ . Normalizing the reward function to be in  $[0, 1]$ , the expected regret of the FM DP is  $\Omega(\sqrt{sp(\mathbf{h}^+)WT})$ , which completes the proof.  $\square$

## C Proof of Theorem 4

The only difference between the proof of Theorem 4 and 2 lies in the bound of term ②.

*Proof.* Starting from ②, for each  $s \in \mathcal{S}$ , we bound  $(\tilde{P}^k(\cdot | s) - P^k(\cdot | s))h_k$ . For simplicity, we remove the subscriptions of  $s$  and use  $\tilde{P}^k$  and  $P^k$  to denote the vector for  $s$ -th row of the two matrix.

$$\begin{aligned}
& \sum_{s \in \mathcal{S}} (\tilde{P}^k(s) - P^k(s))h_k(s) \\
&= \sum_{s_1 \in \mathcal{S}_1} \sum_{s_{-1} \in \mathcal{S}^{-1}} (P_1(s_1)P_{-1}(s_{-1}) - \tilde{P}_1(s_1)\tilde{P}_{-1}(s_{-1}))h_k(s_1, s_{-1}) \\
&= \sum_{s_1} \left[ (P_1(s_1) - \tilde{P}_1(s_1)) \sum_{s_{-1}} \tilde{P}_{-1}(s_{-1})h_k(s_1, s_{-1}) \right] + \\
& \quad \sum_{s_{-1}} \left[ (P_{-1}(s_{-1}) - \tilde{P}_{-1}(s_{-1})) \sum_s P_1(s)h_k(s, s_{-1}) \right] \\
&= \sum_{s_1} (P_1(s_1) - \tilde{P}_1(s_1))h_{1k}(s_1) + \sum_{s_{-1}} (P_{-1}(s_{-1}) - \tilde{P}_{-1}(s_{-1}))h_{-1k}(s_{-1}),
\end{aligned}$$

where  $h_{1k}(s_1) := \sum_{s_{-1}} \tilde{P}_{-1}(s_{-1})h_k(s_1, s_{-1})$  and  $h_{-1k}(s_{-1}) := \sum_{s_1} P_1(s_1)h_k(s_1, s_{-1})$ . As  $\text{span}(h_{1k}) \leq \text{sp}_1(M_k)$ ,

$$\sum_{s \in \mathcal{S}} (\tilde{P}^k(s) - P^k(s))h_k(s) \leq |P_1 - \tilde{P}_1|_1 \text{sp}_1(M_k) + \sum_{s_{-1}} (P_{-1}(s_{-1}) - \tilde{P}_{-1}(s_{-1}))h_{-1k}(s_{-1}). \quad (12)$$

By applying (12) recurrently, we have

$$\sum_{s \in \mathcal{S}} (\tilde{P}^k(s) - P^k(s))h_k(s) \leq \sum_{i=1}^m |P_i - \tilde{P}_i|_1 \text{sp}_i(M_k).$$

Note that  $\text{sp}_i(M_k)$  is generally smaller than  $\text{span}(h_k)$ . In our lower bound case each  $\text{sp}_i = \frac{1}{m} \text{span}(h_k)$ , which improves our upper bound by a scale of  $1/m$ .

The reduction of  $l$  can be achieved by bounding each factored reward to be in  $[1, 1/l]$ . The following proof remains the same.  $\square$

## D FSRL algorithm

Here we provide a complete description of the FSRL algorithm that was omitted in the main paper due to space considerations.

---

### Algorithm 2 FSRL

---

**Input:**  $\mathcal{S}, \mathcal{A}, T$ , encoding  $\mathcal{G}$  and upper bound on sum of factored span  $Q$ .

$k \leftarrow 1; t \leftarrow 1; t_k \leftarrow 1; T_k = 1; \mathcal{H} \leftarrow \{\}$

**repeat**

    Choose  $M_k \in \mathcal{M}_k$  by solving the following optimization over  $M \in \mathcal{M}_k$ ,

$$\max \lambda^*(M) \quad \text{subject to} \quad Q(h) \leq Q \text{ for } h \text{ being the bias vector of } M.$$

    Compute  $\tilde{\pi}_k = \pi(M_k)$ .

**for**  $t = t_k$  **to**  $t_k + T_k - 1$  **do**

        Apply action  $a_t = \pi_k(s_t)$

        Observe new state  $s_{t+1}$

        Observe new rewards  $r_{t+1} = (r_{t+1,1}, \dots, r_{t+1,l})$

$\mathcal{H} = \mathcal{H} \cup \{(s_t, a_t, r_{t+1}, s_{t+1})\}$

$t \leftarrow t + 1$

**end for**

$k \leftarrow k + 1$ .

$T_k \leftarrow \lceil k/L \rceil; t_k \leftarrow t + 1$ .

**until**  $t_k > T$

---



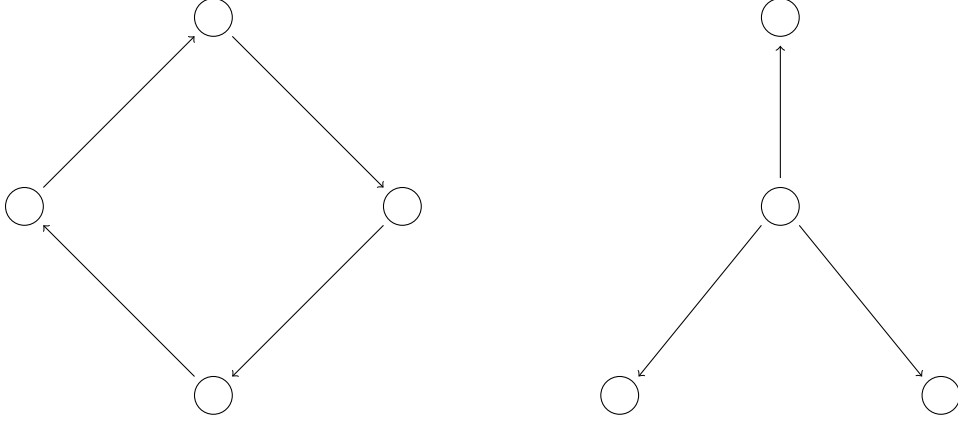

Figure 4: Circle and three-leg structure with a size 4. State space is a 4-dimensional vector with each dimension as  $\{0, 1\}$  representing whether the computer is working or not. Arrows represent the scopes of dimension. Each node has an arrow to itself, which we ignored in the figure.

## E Experiment Setups

**Circle and Three-leg structures.** Our computer network administrator domain with a circle and a three-leg structure Guestrin et al. (2001); Schuurmans and Patrascu (2002) are shown in Figure 4. Each computer gives a 1 reward when it is work and a 0 reward otherwise. The factored transition matrix for network with size  $m$  is

$$P(s[i] = 0 \mid s[i] = 1, s) = \min\{1, \alpha_1 |\epsilon_i^1| + \sum_{j \in Z_i^P} \alpha_2 |\eta_{ij}^1| \mathbb{1}(s[j] = 0)\}, \forall i \in [m],$$

$$P(s[i] = 0 \mid s[i] = 0, s) = \min\{\max\{|\epsilon_i^0|, 0.5\} + \sum_{j \in Z_i^P} \alpha_2 |\eta_{ij}^0| \mathbb{1}(s[j] = 0)\}, \forall i \in [m],$$

where  $\alpha_1, \alpha_2 = 0.1$  are constant and  $\epsilon_i^1, \epsilon_i^0, \eta_{ij}^1, \eta_{ij}^0$  are all white noise. To avoid the extreme cases in our lower bound, both the MDPs are set to have limited diameters.
